# Supplementary material
Source: Elsevier journal article supplement (https://www.sciencedirect.com/science/article/pii/S1699258X20301935)
Supplement: mmc1 [file S1699258X20301935:mmc1.pdf]

**Tabla 1 suplementaria.**— Frecuencia de brotes de la enfermedad en los estudios realizados en España sobre lupus eritematoso sistémico y embarazo.

|                              | <b>De la Hera et al</b>                                                                                                                                                                                   | <b>Carmona et al (8)</b>                                                                            | <b>Cortés-Hernández et al (9)</b>                                                                 |
|------------------------------|-----------------------------------------------------------------------------------------------------------------------------------------------------------------------------------------------------------|-----------------------------------------------------------------------------------------------------|---------------------------------------------------------------------------------------------------|
| <b>Definición de brote</b>   | Aumento del nivel de la actividad (según la escala SLEPDAI) >4 puntos o cuando se ha considerado necesario, por parte del facultativo a cargo, un aumento de la medicación para control de la enfermedad. | Cuando una manifestación clínica atribuible a la enfermedad aparecía durante el periodo de estudio. | Cuando una manifestación clínica atribuible a la enfermedad requería un cambio en el tratamiento. |
| <b>Brote embarazo, n (%)</b> | 12 (18,8 %)                                                                                                                                                                                               | 10 (16,7%)                                                                                          | 19 (18,4%)                                                                                        |
| <b>Brote posparto, n (%)</b> | 12 (30,8 %)                                                                                                                                                                                               | 5 (8,3 %)                                                                                           | 20 (19,4%)                                                                                        |

HTA: hipertensión arterial; SAF: síndrome antifosfolípido; HCQ: hidroxicloroquina; AZA: azatioprina

Los porcentajes de brotes en nuestra cohorte están calculados sobre el número de embarazos con datos (54 para brotes durante el embarazo y 39 en el posparto)

**Tabla 2 suplementaria.**– Tipo de brotes durante el embarazo de acuerdo al momento de aparición y al órgano afectado.

| <b>Manifestación</b>                                             | <b>Nº de brotes Embarazo</b> | <b>Nº de brotes Posparto</b> |
|------------------------------------------------------------------|------------------------------|------------------------------|
| <b>Cutánea</b>                                                   | 4                            | 0                            |
| <b>Músculo-esquelética</b>                                       | 5                            | 1                            |
| <b>Manifestaciones generales<br/>y/o alteraciones analíticas</b> | 1                            | 5                            |
| <b>Nefropatía</b>                                                | 2                            | 6                            |

**Tabla 3 Suplementaria.**– Comparativa de los resultados en los pacientes con nefritis lúpica.

|                                     | <b>de la Hera et al</b><br><b>(n=64)</b> |                               |                 | <b>Carmona et al</b><br><b>(n=102)</b> |                               |                 |
|-------------------------------------|------------------------------------------|-------------------------------|-----------------|----------------------------------------|-------------------------------|-----------------|
|                                     | <b>NL</b><br><b>(n=11)</b>               | <b>No NL</b><br><b>(n=53)</b> | <b><i>p</i></b> | <b>NL</b><br><b>(n=10)</b>             | <b>No NL</b><br><b>(n=43)</b> | <b><i>p</i></b> |
| <b>Brote embarazo, N° (%)</b>       | 3 (27,3)                                 | 9 (17)                        | 0,11            | 5 (30)                                 | 12 (24)                       | N.S             |
| <b>HTA, N° (%)</b>                  | 2 (18,2)                                 | 1 (1,9)                       | 0,02            | 5 (50)                                 | 5 (11,6)                      | 0,01            |
| <b>Parto prematuro, N° (%)</b>      | 2 (18,2)                                 | 4 (7,5)                       | 0,37            | 3 (30)                                 | 11 (25,5)                     | N.S             |
| <b>Edad gestacional, media (DE)</b> | 36,7 (1,75)                              | 38,1 (1,78)                   | 0,29            | 35,9 (3,7)                             | 37,3 (4,2)                    | 0,04            |
| <b>Peso RN, media (DE)</b>          | 2770 (517)                               | 2879 (549)                    | 0,54            | 2441 (967)                             | 3229 (1747)                   | N.S             |

NL: nefritis lúpica; HTA: Hipertensión arterial, RN: recién nacido, DE: desviación estándar, N.S: no significativo
